# Supplementary material for: The Impact of a Six-Year Existing Screening Programme Using the Faecal Immunochemical Test in Flanders (Belgium) on Colorectal Cancer Incidence, Mortality and Survival: A Population-Based Study
Source: MDPI journal article supplement (doi:10.3390/ijerph20021654), 2023-01-16
Supplement: s1 [file s1]

## **Supplementary materials for**

### **The impact of a six-year existing screening programme using the faecal immunochemical test in Flanders (Belgium) on colorectal cancer incidence, mortality and survival: a population-based study**

**Supplementary Materials:** **Table S1.** The STROBE research checklist for observational studies in epidemiology applied in the current study. **Table S2.** Characteristics of the study subjects in subgroups by screening status, with the post-colonoscopy CRC subgroup included (the last column). **Supplementary text.** Relative survival of the post-colonoscopy colorectal cancer subgroup. **Figure S1.** Trends of age-specific CRC mortality in people aged 50-79 years in Flanders, Belgium during 2004-2018 (by individual 5-year age group). **Figure S2.** Distribution of CRC stage by screening status, with the post-colonoscopy CRC subgroup included. **Figure S3.** Five-year relative survival by screening status, with the post-colonoscopy CRC subgroup included.

**Table S1** – The STROBE research checklist for observational studies in epidemiology applied in the current study.

|                           | Item No | Recommendation                                                                                                                                                                       | Page No.                                               |
|---------------------------|---------|--------------------------------------------------------------------------------------------------------------------------------------------------------------------------------------|--------------------------------------------------------|
| Title and abstract        | 1       | Title                                                                                                                                                                                | 1                                                      |
|                           |         | Provide in the abstract an informative and balanced summary of what was done and what was found                                                                                      | 1                                                      |
| Introduction              |         |                                                                                                                                                                                      |                                                        |
| Background/rationale      | 2       | Explain the scientific background and rationale for the investigation being reported                                                                                                 | 1-2                                                    |
| Objectives                | 3       | State specific objectives, including any prespecified hypotheses                                                                                                                     | 2                                                      |
| Methods                   |         |                                                                                                                                                                                      |                                                        |
| Study design              | 4       | Present key elements of study design early in the paper                                                                                                                              | 2                                                      |
| Setting                   | 5       | Describe the setting, locations, and relevant dates, including periods of recruitment, exposure, follow-up, and data collection                                                      | 2-4                                                    |
| Participants              | 6       | Give the eligibility criteria, and the sources and methods of selection of participants. Describe methods of follow-up                                                               | 2-3<br>Figure 1                                        |
|                           |         | (b) For matched studies, give matching criteria and number of exposed and unexposed                                                                                                  | Not applicable                                         |
| Variables                 | 7       | Clearly define all outcomes, exposures, predictors, potential confounders, and effect modifiers.                                                                                     | 2-4                                                    |
| Data sources/ measurement | 8       | For each variable of interest, give sources of data and details of methods of assessment (measurement). Describe comparability of assessment methods if there is more than one group | 2-4                                                    |
| Bias                      | 9       | Describe any efforts to address potential sources of bias                                                                                                                            | 3-4 (combined with 14&15 - Discussion)                 |
| Study size                | 10      | Explain how the study size was arrived at                                                                                                                                            | 4-5                                                    |
| Quantitative variables    | 11      | Explain how quantitative variables were handled in the analyses.                                                                                                                     | 10 (Table 2)<br>Figure 3 shows how age was categorised |
| Statistical methods       | 12      | Describe all statistical methods, including those used to control for confounding                                                                                                    | 4                                                      |
|                           |         | Describe any methods used to examine subgroups and interactions                                                                                                                      | 4                                                      |
|                           |         | Explain how missing data were addressed                                                                                                                                              | 4                                                      |
|                           |         | If applicable, explain how loss to follow-up was addressed                                                                                                                           | 2                                                      |
|                           |         | Describe any sensitivity analyses                                                                                                                                                    | Not applicable                                         |
| Results                   |         |                                                                                                                                                                                      |                                                        |
| Participants              | 13      | Report numbers of individuals at each stage of study                                                                                                                                 | 4-5                                                    |
|                           |         | Give reasons for non-participation at each stage                                                                                                                                     | Not applicable                                         |
|                           |         | Consider use of a flow diagram                                                                                                                                                       | Figure 1                                               |
| Descriptive data          | 14      | Characteristics of study participants                                                                                                                                                | 10                                                     |
|                           |         | Number of participants with missing data                                                                                                                                             | 4                                                      |
|                           |         | Follow-up time                                                                                                                                                                       | 4 (combined with 2 – Methods)                          |
| Outcome data              | 15      | Report numbers of outcome events or summary measures over time                                                                                                                       | 4                                                      |
| Main results              | 16      | Give unadjusted estimates and, if applicable, confounder-adjusted estimates and their precision (eg, 95% confidence interval).                                                       | 5-12                                                   |

|                          |    |                                                                                                                                                                            |                |
|--------------------------|----|----------------------------------------------------------------------------------------------------------------------------------------------------------------------------|----------------|
|                          |    | Make clear which confounders were adjusted for and why they were included                                                                                                  |                |
|                          |    | Report category boundaries when continuous variables were categorized                                                                                                      | Not applicable |
|                          |    | If relevant, consider translating estimates of relative risk into absolute risk for a meaningful time period                                                               | Not applicable |
| Other analyses           | 17 | Report other analyses done—eg analyses of subgroups and interactions, and sensitivity analyses                                                                             | 10-12          |
| <b>Discussion</b>        |    |                                                                                                                                                                            |                |
| Key results              | 18 | Summarise key results with reference to study objectives                                                                                                                   | 12             |
| Limitations              | 19 | Discuss limitations of the study, taking into account sources of potential bias or imprecision. Discuss both direction and magnitude of any potential bias                 | 14-15          |
| Interpretation           | 20 | Give a cautious overall interpretation of results considering objectives, limitations, multiplicity of analyses, results from similar studies, and other relevant evidence | 12-15          |
| Generalisability         | 21 | Discuss the generalisability (external validity) of the study results                                                                                                      | 14-15          |
| <b>Other information</b> |    |                                                                                                                                                                            |                |
| Funding                  | 22 | Give the source of funding and the role of the funders for the present study and, if applicable, for the original study on which the present article is based              | 15             |

**Table S2.** Characteristics of the study subjects in subgroups by screening status, with the post-colonoscopy CRC subgroup included (the last column).

|                                               | Screen-detected CRC<br>(N=4,959) | FIT-interval cancer<br>(N=905) | CRC in never-invited<br>(N=25,353) | FIT<br>non-participant CRC<br>(N=4,555) | Post-colonoscopy<br>CRC<br>(N=24) |
|-----------------------------------------------|----------------------------------|--------------------------------|------------------------------------|-----------------------------------------|-----------------------------------|
| Men                                           | 3,157 (63.7%)                    | 468 (51.7%)                    | 15,298 (60.3%)                     | 2,854 (62.7%)                           | 14 (58.3%)                        |
| Mean age (years) $\pm$ SD                     | 65.7 $\pm$ 5.8                   | 66.5 $\pm$ 5.4                 | 64.4 $\pm$ 6.9                     | 66.2 $\pm$ 5.6                          | 68.5 $\pm$ 4.9                    |
| Mean time between FIT and<br>diagnosis (days) | 77.9                             | 425.0                          | -                                  | -                                       | 993.8                             |
| Stage                                         |                                  |                                |                                    |                                         |                                   |
| I                                             | 2,532 (51.0%)                    | 234 (25.9%)                    | 4,352 (17.2%)                      | 845 (18.6%)                             | 3 (12.5%)                         |
| II                                            | 799 (16.1%)                      | 151 (16.7%)                    | 5,880 (23.2%)                      | 980 (21.5%)                             | 0 (0%)                            |
| III                                           | 1185 (23.9%)                     | 249 (27.5%)                    | 7,325 (28.9%)                      | 1257 (27.6%)                            | 12 (50%)                          |
| IV                                            | 325 (6.6%)                       | 241 (26.6%)                    | 5,723 (22.6%)                      | 1321 (29.0%)                            | 8 (33.3%)                         |
| Unknown                                       | 118 (2.4%)                       | 30 (3.3%)                      | 2,073 (8.2%)                       | 152 (3.3%)                              | 1 (4.2%)                          |

CRC: Colorectal cancer; FIT, Faecal immunochemical test

## **Supplementary text:**

### **Relative survival of the post-colonoscopy colorectal cancer subgroup**

As introduced in the main manuscript, we present our results on individual relative survival of the “post-colonoscopy colorectal cancer (CRC) after an organised FIT+” subgroup in this Supplementary Materials due to the small sample of the subgroup (24 cases during 2013-2019). Similar to the screen-detected CRC, FIT non-participant and never-invited subgroups, the majority of the post-colonoscopy CRC subgroup were men (58.3%) and its mean age at diagnosis was slightly higher than the other subgroups (68.5 vs. 64.4-66.5 years, respectively). The mean time between FIT participation and CRC diagnosis among post-colonoscopy CRCs were 12.8 times and 2.3 times longer than screen-detected CRCs and FIT-interval cancers (Table S2). With regards to tumour stage distribution, 83.3% of CRCs in this subgroup were at an advanced stage III or IV while this proportion among screen-detected CRCs was only 30.5% and among FIT-interval cancers, CRCs in FIT non-participants and never-invited was 51.5-56.6% (Table S2 and Figure S2).

Among the subgroups by screening status investigated in this study, post-colonoscopy CRCs had the lowest 5-year relative survival of 50.9% (screen-detected CRCs: 93.8%, FIT-interval cancers: 67.6%, CRC in never-invited: 66.7%, CRCs in FIT non-participant CRCs: 61.9%) (Figure S3). When comparing with the 5-year relative survival between post-colonoscopy CRCs vs. the other subgroups, significance level was only reached in the comparison between post-colonoscopy CRCs and screen-detected CRCs (due to a large difference of >40%) but not in the comparisons with the other subgroups (due to the limited number of post-colonoscopy CRCs: 24 cases). To sufficiently study the survival of post-colonoscopy CRCs after FIT+, a longer study period (to provide an adequate sample size) or a different study methodology is required.

## Figures S1 to S3

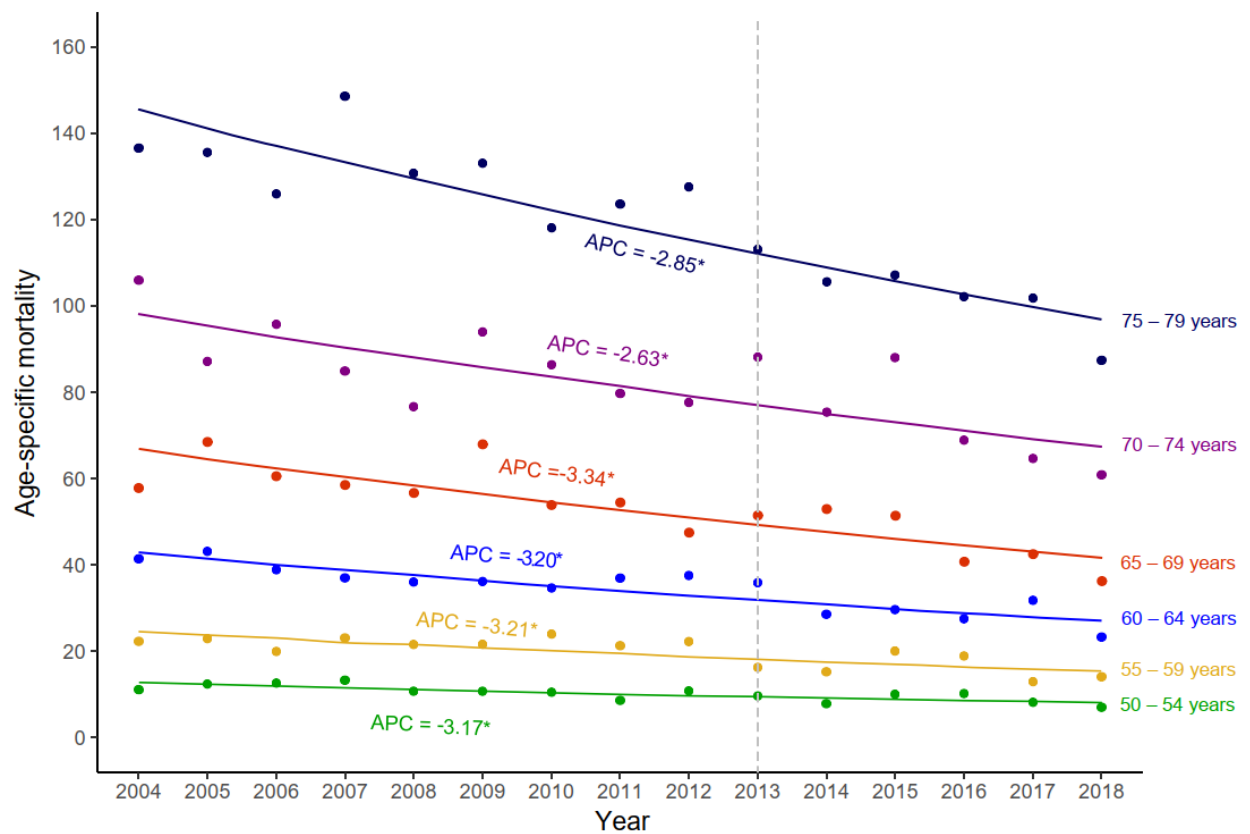

**Figure S1.** Trends of age-specific CRC mortality in people aged 50-79 years in Flanders, Belgium during 2004-2018 (by individual 5-year age group). The transparent dashed line presents the year when the organised colorectal cancer screening programme was initiated in Flanders. CRC, colorectal cancer; APC, annual percentage change; \*statistically significant

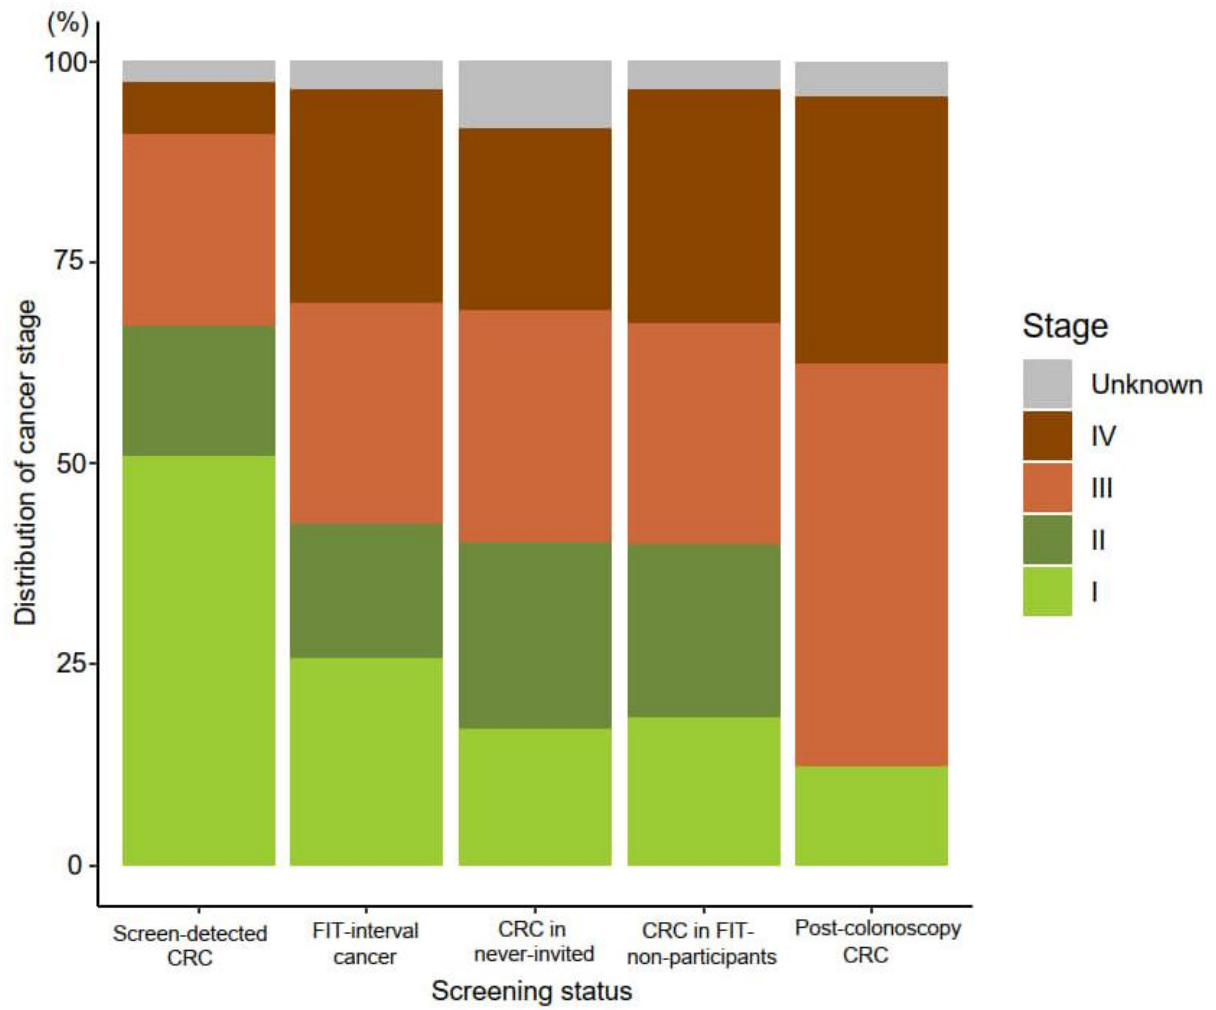

**Figure S2.** Distribution of CRC stage by screening status, with the post-colonoscopy CRC subgroup included.  
CRC, colorectal cancer, FIT, faecal immunochemical test

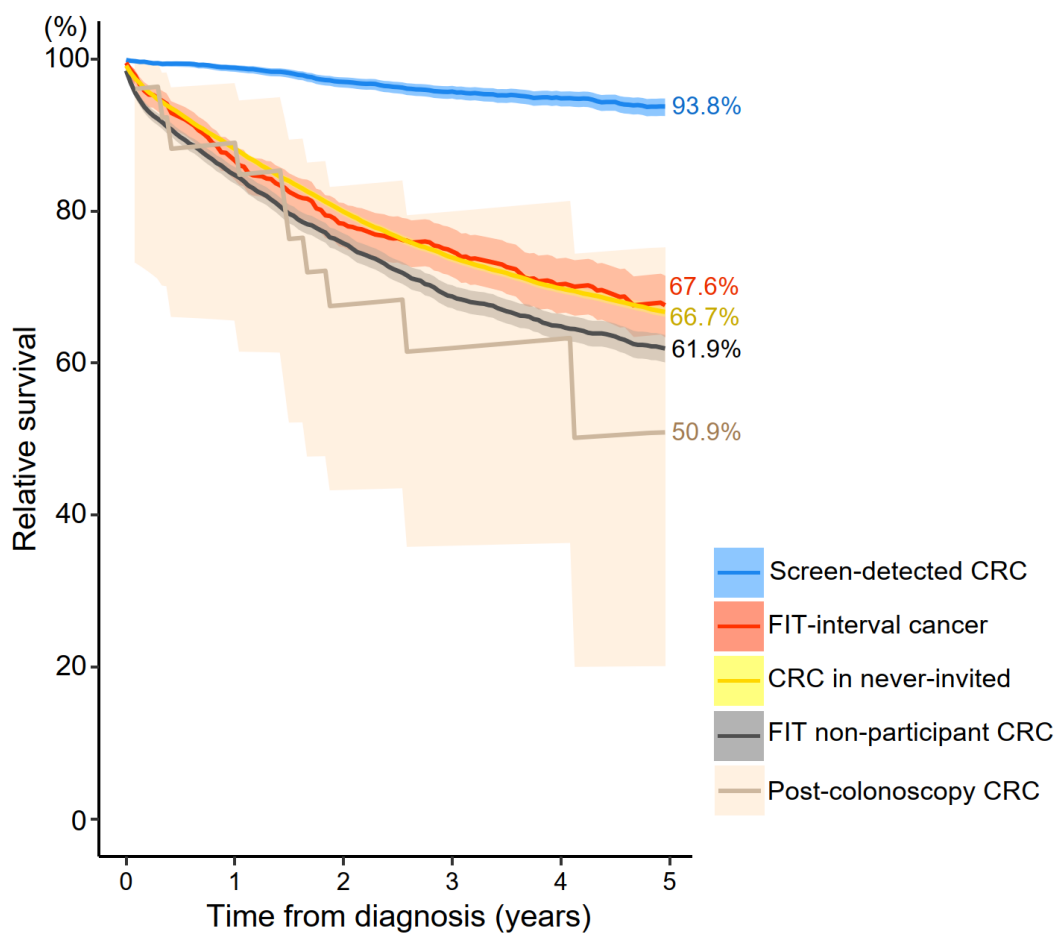

**Figure S3.** Five-year relative survival by screening status, with the post-colonoscopy CRC subgroup included. CRC, colorectal cancer, FIT, faecal immunochemical test.
